# Supplementary material for: Inventory of African desert dust events in the north-central IberianPeninsula in 2003–2014 based on sun-photometer–AERONET and particulate-mass–EMEP data
Source: Copernicus journal article supplement (doi:10.5194/acp-16-8227-2016), 2016-07-08
Supplement: Supplementary file 1 [file acp-16-8227-2016-supplement.pdf]

Supplement of Atmos. Chem. Phys., 16, 8227–8248, 2016  
<http://www.atmos-chem-phys.net/16/8227/2016/>  
doi:10.5194/acp-16-8227-2016-supplement  
© Author(s) 2016. CC Attribution 3.0 License.

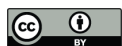

Atmospheric  
Chemistry  
and Physics  
Open Access  
EGU

*Supplement of*

## **Inventory of African desert dust events in the north-central Iberian Peninsula in 2003–2014 based on sun-photometer–AERONET and particulate-mass–EMEP data**

**Victoria E. Cachorro et al.**

*Correspondence to:* Victoria E. Cachorro (chiqui@goa.uva.es)

The copyright of individual parts of the supplement might differ from the CC-BY 3.0 licence.

Figure S1

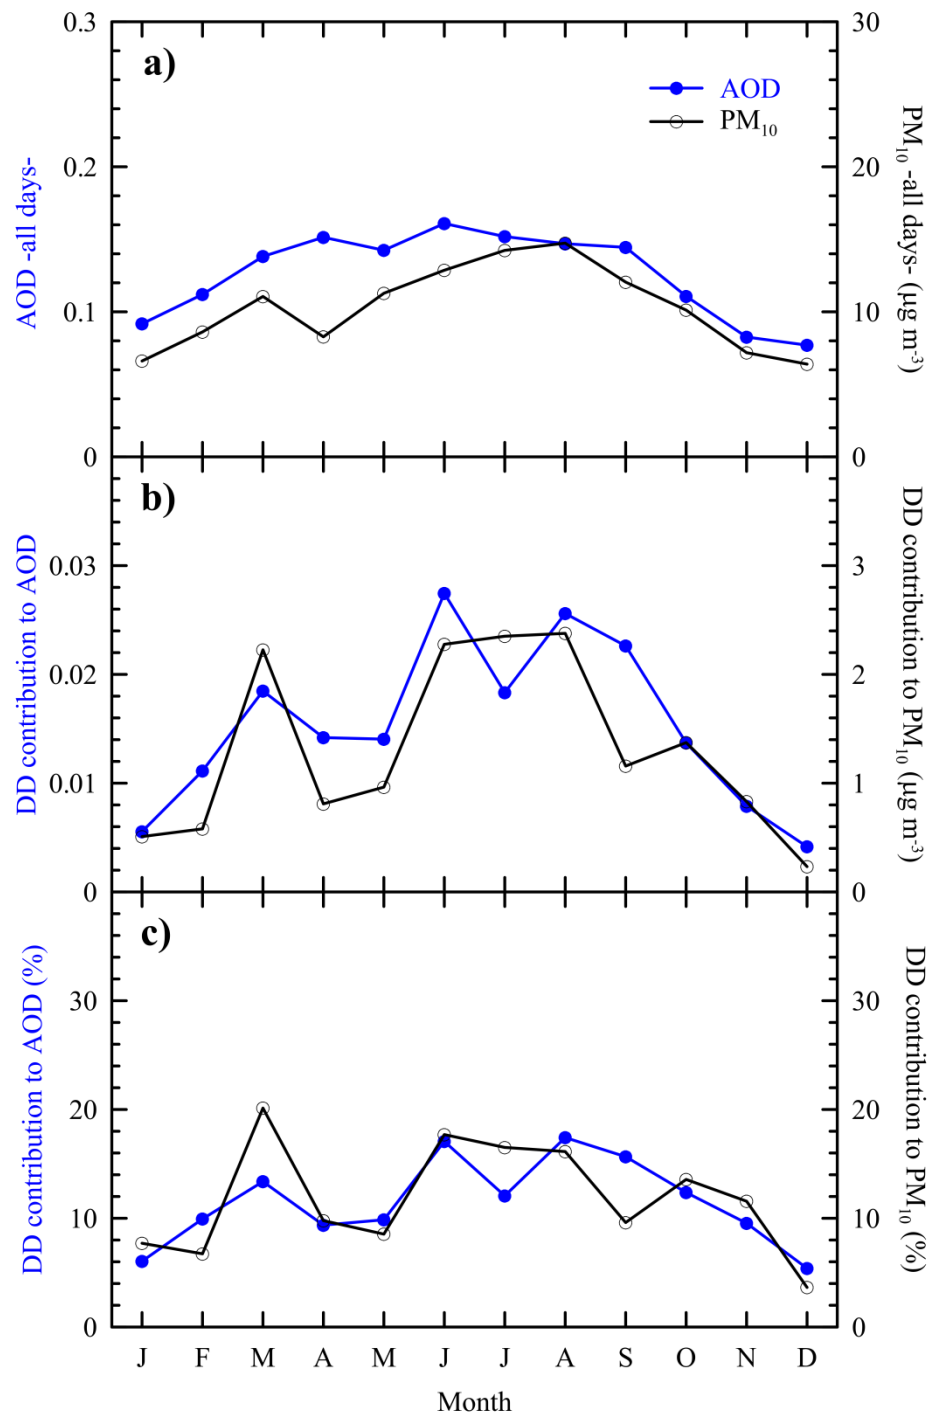

Figure S1. a) Annual cycle of the total AOD and PM<sub>10</sub>; b) annual cycle of the contribution of DD to total AOD and PM<sub>x</sub> in absolute and c) relative values.

Figure S2

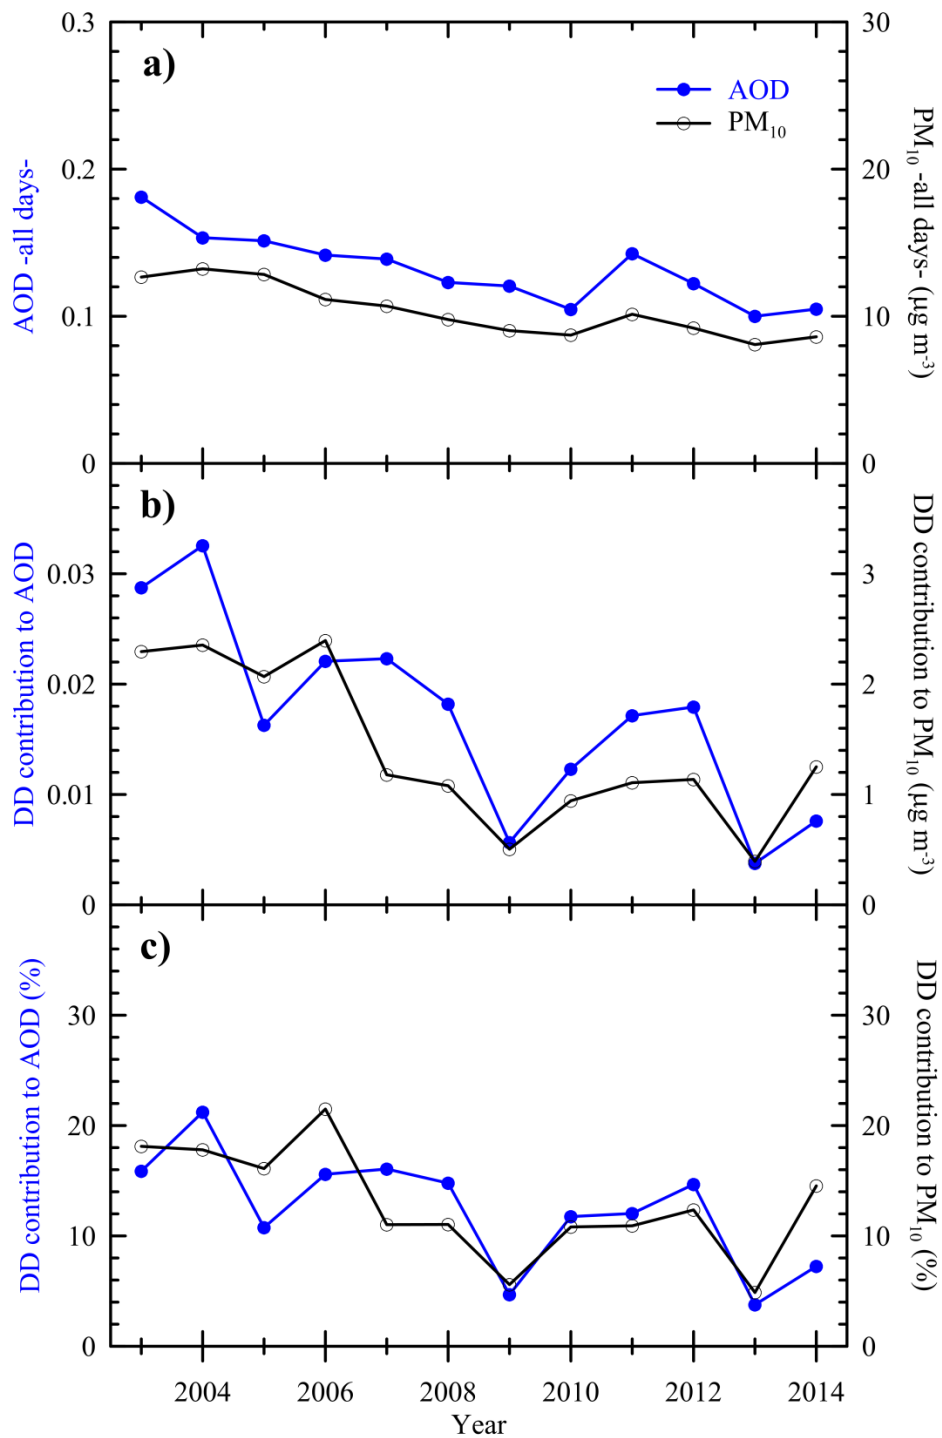

Figure S2. a) Inter-annual variation of the total AOD and PM10; b) inter-annual variation of the contribution of DD to total AOD and PM<sub>x</sub> in absolute and c) relative values.
